# Standard Addition Quantitative Real-Time PCR (SAQPCR): A Novel Approach for Determination of Transgene Copy Number Avoiding PCR Efficiency Estimation

Yuji Huang<sup>1,9</sup>, Xueren Yin<sup>1,9</sup>, Changqing Zhu<sup>1</sup>, Weiwei Wang<sup>1</sup>, Donald Grierson<sup>1,2</sup>, Changjie Xu<sup>1\*</sup>, Kunsong Chen<sup>1</sup>

**1** Laboratory of Fruit Quality Biology/The State Agriculture Ministry Laboratory of Horticultural Plant Growth, Development and Quality Improvement, Zhejiang University, Hangzhou, P. R. China, **2** Plant and Crop Sciences Division, School of Biosciences, University of Nottingham, Sutton Bonington Campus, Loughborough, United Kingdom

## Abstract

Quantitative real-time polymerase chain reaction (qPCR) has been previously applied to estimate transgene copy number in transgenic plants. However, the results can be erroneous owing to inaccurate estimation of PCR efficiency. Here, a novel qPCR approach, named standard addition qPCR (SAQPCR), was devised to accurately determine transgene copy number without the necessity of obtaining PCR efficiency data. The procedures and the mathematical basis for the approach are described. A recombinant plasmid harboring both the internal reference gene and the integrated target gene was constructed to serve as the standard DNA. It was found that addition of suitable amounts of standard DNA to test samples did not affect PCR efficiency, and the guidance for selection of suitable cycle numbers for analysis was established. Samples from six individual T<sub>0</sub> tomato (*Solanum lycopersicum*) plants were analyzed by SAQPCR, and the results confirmed by Southern blot analysis. The approach produced accurate results and required only small amounts of plant tissue. It can be generally applied to analysis of different plants and transgenes. In addition, it can also be applied to zygosity analysis.

**Citation:** Huang Y, Yin X, Zhu C, Wang W, Grierson D, et al. (2013) Standard Addition Quantitative Real-Time PCR (SAQPCR): A Novel Approach for Determination of Transgene Copy Number Avoiding PCR Efficiency Estimation. PLoS ONE 8(1): e53489. doi:10.1371/journal.pone.0053489

**Editor:** M. Lucrecia Alvarez, TGen, United States of America

**Received:** July 26, 2012; **Accepted:** November 28, 2012; **Published:** January 7, 2013

**Copyright:** © 2013 Huang et al. This is an open-access article distributed under the terms of the Creative Commons Attribution License, which permits unrestricted use, distribution, and reproduction in any medium, provided the original author and source are credited.

**Funding:** This work was supported by the National Basic Research Program of China (973 Program) [2011CB100600]; the Program of International Science and Technology Cooperation [2011DFB31580] and the National Natural Science Foundation of China [31030052]. The funders had no role in study design, data collection and analysis, decision to publish, or preparation of the manuscript.

**Competing Interests:** The authors have declared that no competing interests exist.

\* E-mail: chjxu@zju.edu.cn

<sup>9</sup> These authors contributed equally to this work.

## Introduction

Plant genetic transformation is important for both basic plant biology research and industrial crop improvement. For example, through tomato transformation, Hamilton *et al.* [1,2] proved that *pTOM13* encodes 1-aminocyclopropane-1-carboxylic acid oxidase, a key enzyme for ethylene biosynthesis; and Butelli *et al.* [3] observed that anthocyanin accumulation in tomato fruit requires coordinated regulation of MYB and basic helix-loop-helix (bHLH) transcription factors. Meanwhile, some successful genetically modified crops, including herbicide/pest resistant soybean, maize, cotton and oilseed rape, as well as nutritionally enriched golden rice, have already been commercially planted.

During plant genetic transformation, foreign DNA is randomly inserted into the plant genome as single or multiple copies. Frequently, selection of single-copy transgenic plants is a prerequisite for subsequent studies. This is often conducted through traditional approaches, such as Southern blot [1,3,4] and T-DNA flanking sequence analysis [5]. However, these techniques have their disadvantages. The Southern blot analysis requires relatively large quantities of DNA, and therefore a large amount of transgenic plant material, which is not available at the

early seedling stage, while the T-DNA flanking sequence analysis is technically unstable and complicated owing to possible rearrangement or broken-end structure of integrated T-DNA [6].

Recently, quantitative real-time PCR (qPCR) has also been applied to estimate transgene copy number [7–16]. Unlike the traditional hybridization-based methods, qPCR assay allows more samples to be analyzed in a shorter time and requires much less plant tissue. However, despite its increasing application, there are controversies concerning its accuracy. In some studies, the results of transgene copy number determination have shown mismatches between qPCR and Southern blot analysis [8,12,13,15,17]. Some researchers have suggested that qPCR can only be viewed as complementary to Southern blot analysis for determination of transgene copy number, and that the technique is not sufficiently accurate and reproducible to discriminate twofold differences in transgene copy number [10,17]. Thus, the accurate determination of transgene copy number by qPCR is not always possible by these approaches.

In a survey of previous literature on qPCR-based transgene copy number determination, it was found that some studies assumed that the PCR efficiency was 100%, or took for granted that efficiencies for the integrated target gene (*t*) and the internal

reference gene (*r*) were equal, while most other studies estimated PCR efficiency either through the establishment of a standard curve by serial dilution [8,13], or a mathematical calculation from the amplification curve itself [18–21]. However, none of these strategies is perfect. The true PCR efficiency cannot be 100%, and the efficiency for *t* and *r* can sometimes be quite different. PCR efficiency estimation based on a serial dilution standard curve can be erroneous because only one PCR efficiency value is generated, but this cannot hold true for serial samples where the concentrations of template DNA and potential inhibitors varies over several orders of magnitude [20,22–25]. Also, estimation from the amplification curve itself can sometimes be quite difficult and complicated, and the results can vary between different approaches. Furthermore, even using the identical approach, the results can still be inconsistent when different analysis parameter settings for calculation were selected. In summary, it is often difficult to obtain accurate PCR efficiency, which results in possible erroneous estimation of transgene copy number from qPCR.

In this study, we present a novel qPCR approach, named standard addition qPCR (SAQPCR), to accurately determine transgene copy number. The strategy is to add known amounts of standard DNA to test samples to change fluorescence intensity and Ct values, which is similar to standard addition in quantitative chemical analysis [26]. In this assay, the estimation of PCR efficiency can be bypassed, which is not the case in the previously mentioned approaches.

## Materials and Methods

### Theoretical Basis for Determination of Transgene Copy Number by SAQPCR

The fluorescence produced during the qPCR exponential amplification phase is dependent on several factors as indicated in the following equation:

$$F_n = N_0 \times FSM \times (1 + E)^{C_n} \quad (1)$$

Where  $F_n$  is fluorescence intensity;  $N_0$  is initial number of molecules of the investigated gene; FSM is the fluorescence of a single DNA molecule of a specific size, such as that of the PCR product;  $E$  is PCR efficiency; and  $C_n$  indicates cycle number.

Then for the internal reference gene (*r*) and the integrated target gene (*t*), the following equations apply:

$$F_{nr} = N_{0r} \times FSM_r \times (1 + E_r)^{C_{nr}} \quad (2)$$

$$F_{nt} = N_{0t} \times FSM_t \times (1 + E_t)^{C_{nt}} \quad (3)$$

Since the PCR product size for *r* and *t* is same in this approach, and the fluorescence intensity was recorded under the same conditions,  $FSM_r$  can be regarded as equal to  $FSM_t$ . Therefore, the following equation can be obtained from Equation (2) divided by the Equation (3).

$$\frac{F_{nr}}{F_{nt}} = \frac{N_{0r} \times (1 + E_r)^{C_{nr}}}{N_{0t} \times (1 + E_t)^{C_{nt}}} \quad (4)$$

And,

transgene copy number

$$\begin{aligned} &= \text{chromosome ploidy} \times \frac{N_{0t}}{N_{0r}} \quad (5) \\ &= \text{chromosome ploidy} \times \frac{F_{nr} \times (1 + E_r)^{C_{nr}}}{F_{nr} \times (1 + E_t)^{C_{nt}}} \end{aligned}$$

For selected values of  $C_{nr}$  and  $C_{nt}$ ,  $F_r$  and  $F_t$  data can be obtained, and therefore, in the above equation  $E$  is the only unknown parameter required for copy number determination. However, as described above in Introduction Section, PCR efficiency cannot be accurately determined either based on a serial dilution standard curve or from the amplification curve itself. Similar situations also occur in quantitative chemical analysis, where accurate determination of analytes in test samples is often interfered with by impurities present, and an approach named ‘standard addition’ is frequently used to solve this matrix effect problem [25]. In this study, a similar strategy was applied to avoid the necessity of estimating PCR efficiency. Different known amounts (0, S, 3S, where S is equal to the estimated  $N_0$  of *r*, which was set at 10,000 molecules in this study) of standard DNA, the recombinant plasmid pHE in this study, were added to test samples. For the qPCR of samples following standard addition of different amounts, the following three equations can be obtained.

$$F_a = N_0 \times FSM \times (1 + E_a)^{C_a} \quad (6)$$

$$F_b = (N_0 + S) \times FSM \times (1 + E_b)^{C_b} \quad (7)$$

$$F_c = (N_0 + 3S) \times FSM \times (1 + E_c)^{C_c} \quad (8)$$

Where  $C_a$ ,  $C_b$ , and  $C_c$  indicate cycles within the exponential amplification phase (Figure 1).

Assuming that the addition of suitable amounts of standard DNA to the test samples does not significantly affect PCR efficiency (which was confirmed as described later in Results and Discussion Section), the PCR efficiencies both before and after standard DNA addition were set as  $E$ , and Equations (6)–(8) can be re-written as:

$$F_a = N_0 \times FSM \times (1 + E)^{C_a} \quad (9)$$

$$F_b = (N_0 + S) \times FSM \times (1 + E)^{C_b} \quad (10)$$

$$F_c = (N_0 + 3S) \times FSM \times (1 + E)^{C_c} \quad (11)$$

Following the addition of standard DNA, a sequence where  $C_{ta} > C_{tb} > C_{tc}$  was produced (Figure 1). Setting  $I_b$  as the integer part for  $C_{tb}$  (the reason is given below), and  $C_a = I_b + 1$ ,  $C_b = I_b$ , as well as  $C_c = I_b - 1$ , Equations (9)–(11) can be revised as follows:

$$F_a = N_0 \times FSM \times (1 + E)^{(I_b+1)} \quad (12)$$

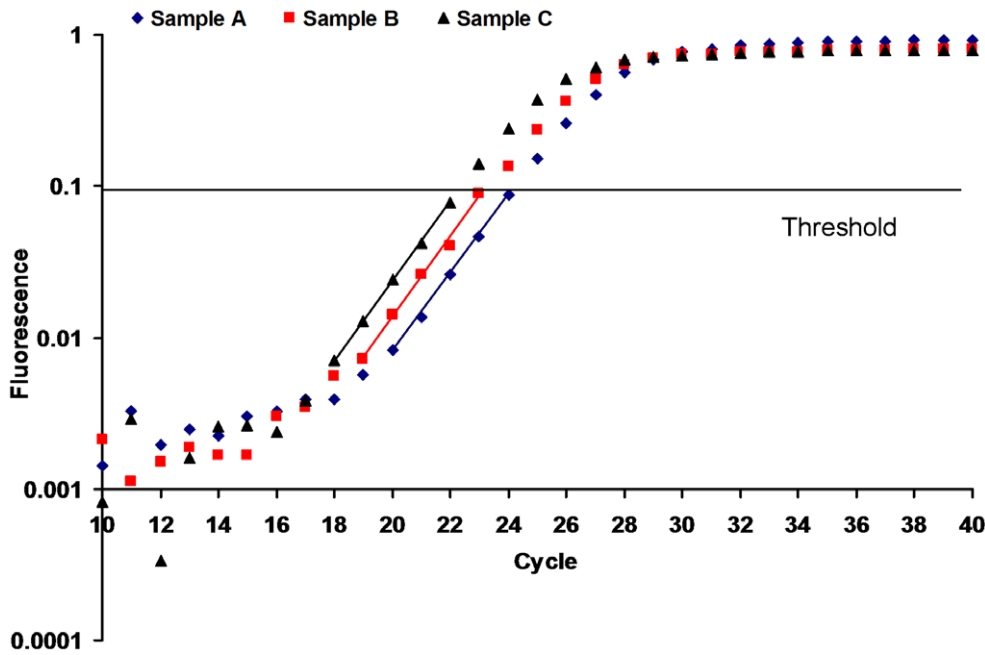

**Figure 1. Effects of standard DNA addition on fluorescence intensity and  $C_t$ .** Oblique lines: exponential amplification phases suggested by LinRegPCR; Sample A: with 1  $\mu$ l of tomato genomic DNA (10.20  $\text{ng } \mu\text{l}^{-1}$ , containing 10,000 *ELIP* molecules  $\mu\text{l}^{-1}$ ) as PCR template; Sample B: with 1  $\mu$ l tomato genomic DNA plus 1  $\mu$ l of pHE (0.051  $\text{pg } \mu\text{l}^{-1}$ , containing 10,000 *ELIP* molecules  $\mu\text{l}^{-1}$ ) as PCR template; Sample C: with 1  $\mu$ l tomato genomic DNA plus 3  $\mu$ l of pHE as PCR template. doi:10.1371/journal.pone.0053489.g001

$$F_b = (N_0 + S) \times \text{FSM} \times (1 + E)^{Ib} \quad (13)$$

$$F_c = (N_0 + 3S) \times \text{FSM} \times (1 + E)^{(Ib-1)} \quad (14)$$

Therefore, the ratios of  $F_a$  to  $F_b$  and  $F_b$  to  $F_c$  can be calculated as follows:

$$\frac{F_a}{F_b} = \frac{N_0 \times (1 + E)}{(N_0 + S)} \quad (15)$$

$$\frac{F_b}{F_c} = \frac{(N_0 + S) \times (1 + E)}{(N_0 + 3S)} \quad (16)$$

">(16)Then the following equation can be obtained from Equation (15) divided by Equation (16).

$$\frac{F_a \times F_c}{F_b^2} = \frac{N_0 \times (N_0 + 3S)}{(N_0 + S)^2} \quad (17)$$

To simplify the formula, set  $R = (F_a \times F_c) / F_b^2$ , then the following equation can be derived.

$$R = \frac{N_0 \times (N_0 + 3S)}{(N_0 + S)^2} \quad (18)$$

In Equation (18),  $N_0$  is the only unknown factor and can be calculated as follows:

$$N_0 = S \times \left[ \sqrt{\frac{(3-2R)^2}{4 \times (1-R)^2} + \frac{R}{1-R}} - \frac{3-2R}{2 \times (1-R)} \right] \quad (19)$$

A Microsoft Excel program (Program S1) was designed to facilitate calculation of  $N_0$ .

$N_0$  of  $r$  and  $t$  was determined respectively. As the addition amount  $S$  for both  $r$  and  $t$  were set equal to the estimated  $N_0$  of  $r$ . Therefore,  $S_r$  is equal to  $S_t$ , and consequently,

transgene copy number =

$$\text{chromosome ploidy} \times \frac{\sqrt{\frac{(3-2R_t)^2}{4 \times (1-R_t)^2} + \frac{R_t}{1-R_t}} - \frac{3-2R_t}{2 \times (1-R_t)}}{\sqrt{\frac{(3-2R_r)^2}{4 \times (1-R_r)^2} + \frac{R_r}{1-R_r}} - \frac{3-2R_r}{2 \times (1-R_r)}} \quad (20)$$

### Transgenic Tomato Plants

Transgenic tomato (*Solanum lycopersicum* Linn. cv. Ailsa Craig) plants, carrying an integrated *Escherichia coli* hygromycin phosphotransferase gene (*HPT*), were previously obtained via *Agrobacterium*-mediated transformation. Primary transformants ( $T_0$ ) lines and wild type plants were used in this study.

### Genomic DNA Extraction

Young leaves were collected and ground to a fine powder in liquid nitrogen. Approximately 100 mg of leaf tissue was used to isolate DNA for PCR with a DNeasy Plant Mini kit (Qiagen), according to the manufacturer's instructions. Approximately 1 g of

**Table 1.** Primers used in this study.

| Gene        | GenBank ID | Forward primer (5'-3')              | Reverse primer (5'-3')                | Application    | PCR product size (bp) |
|-------------|------------|-------------------------------------|---------------------------------------|----------------|-----------------------|
| <i>ELIP</i> | AY547273   | GGTTCGCGATCTAGACAATACT <sup>a</sup> | CAAAATGAAAAGCTTTATATACTC <sup>b</sup> | cloning        | 1019                  |
|             |            | ACAATACTAGTACTTCTTCACCTTT           | AACACGCGAAGTCCTATGAA                  | qPCR           | 200                   |
| <i>HPT</i>  | V01499     | GCCTGAACTCACCGCGACTCTG              | CAGCACTCGTCCGAGGGCAAAGG               | cloning        | 1013                  |
|             |            | GCTCCGCATTGGTCTTGA                  | GGCGTCGGTTCCACTAT                     | qPCR           | 200                   |
|             |            | GATCGTTATGTTTATCGGCACT              | TTGGCGACCTCGTATTGG                    | probe labeling | 515                   |

<sup>a</sup>The underlined nucleotides are the restriction site for *Xba* I; <sup>b</sup> The underlined nucleotides are the restriction site for *Hind* III.  
doi:10.1371/journal.pone.0053489.t001

leaf tissue was used to isolate DNA for Southern blot following an improved CTAB method [27].

### Primer Design

Tomato early light-induced protein (*ELIP*) gene, a single-copy gene [28] was selected as the internal reference gene (*r*), and *E. coli HPT* as the integrated target gene (*t*) in this study. Primer pairs were designed for gene cloning or qPCR, using Primer Premier 5 (PREMIER Biosoft International) according to sequences deposited in GenBank (Table 1).

### Recombinant Plasmid Construction

*ELIP* and *HPT* were amplified by PCR and then ligated into pUCm-T (TaKaRa) to generate plasmids pELIP and pHPT according to traditional protocols of Sambrook and Russell [29]. Following simultaneous digestion of the plasmids with *Xba* I and *Hind* III, the 995-bp fragment from pELIP digestion and the 3768-bp fragment from pHPT digestion were recovered and ligated to generate recombinant plasmid pHE (Figure 2). The authenticity of the recombinant plasmids was confirmed by sequencing.

### DNA Quantification

The tomato genomic DNA and pHE were quantified fluorescently using a Quant-iT<sup>TM</sup> PicoGreen<sup>®</sup> dsDNA Assay Kit (Invitrogen) and a Nano Drop 3300 Fluorospectrometer (Thermo Scientific).

### qPCR

qPCR reactions were performed in a LightCycler<sup>®</sup> (Roche) in a final volume of 12.50  $\mu$ l, including 6.25  $\mu$ l of SYBR<sup>®</sup> Premix Ex Taq<sup>TM</sup> (Takara), 0.25  $\mu$ l of each primer (10  $\mu$ M), 1  $\mu$ l of tomato genomic DNA (10.20 ng  $\mu$ l<sup>-1</sup>), different amounts (0, 1 or 3  $\mu$ l) of pHE (0.051 pg  $\mu$ l<sup>-1</sup>) (Table 2), made up to volume with PCR-grade water. The amplification program was initiated with a preliminary step of 30 s at 95°C, followed by 45 cycles of 5 s at 95°C, 20 s at 60°C, and 20 s at 72°C. A melting curve was generated for each sample at the end of each run to ensure the purity of the amplified products. qPCR was performed with five replicates.

### PCR Efficiency Estimation

PCR efficiencies were estimated based on amplification curves using LinRegPCR [21]. The fluorescence threshold was recorded by the affiliated software of Roche LightCycler 1.5.

### Southern Blot

Digoxigenin (DIG)-based Southern blot was performed. 15  $\mu$ g of tomato genomic DNA was digested with *Hind* III and *Bam*H I, respectively. Only one restriction site for these two restriction

enzymes exists in the plant expression vector used for transformation and no site was present in the hybridization probe. The digested DNA was separated on 0.8% agarose gel, and then transferred to a positively charged nylon membrane (Roche) according to Sambrook and Russell [29]. DIG-labelled *HPT* probe DNA was prepared by PCR with the primers listed (Table 1), hybridization and autoradiography were performed according to DIG Application Manual for Filter Hybridization (Roche).

## Results and Discussion

### Addition of Suitable Amounts of Standard DNA to Test Samples Did Not Affect PCR Efficiency

Although PCR efficiency estimated from the amplification curve itself can be inaccurate and varies between different approaches and different analysis parameter settings, it can be reliably used to evaluate whether differences in the PCR efficiency exist between test samples when identical approach and analysis parameter settings were followed. In this study, PCR efficiencies were estimated with LinRegPCR [21] and the effects of standard DNA addition on changes in PCR efficiency were evaluated. With DNA from all six tomato plants analyzed, the addition of suitable amounts of standard DNA to the test samples did not affect PCR efficiency - see data from a two-copy T<sub>0</sub> plant (Table 2). Therefore, the PCR efficiency of three samples, E<sub>a</sub>, E<sub>b</sub> and E<sub>c</sub> in Equations (6)–(8), can be replaced with the same value (E) in Equations (9)–(11) (Suggested above in Material and Methods Section).

### Guidance for Selection of Suitable Cycle Numbers for Analysis

Appropriate values of C<sub>a</sub>, C<sub>b</sub> and C<sub>c</sub> need to be selected. If too large, the cycles will not be in the exponential amplification phase; if too small, F<sub>a</sub>, F<sub>b</sub>, and F<sub>c</sub> values will be correspondingly small and inaccurate because of the sensitivity of fluorescence detection. Therefore, using six transgenic tomato plants, *ELIP* N<sub>0</sub> was calculated and compared for a value of C<sub>b</sub> within I<sub>b</sub> - 10 to I<sub>b</sub> + 5. For C<sub>b</sub> within I<sub>b</sub> - 4 to I<sub>b</sub>, the calculated *ELIP* N<sub>0</sub> for each of the six analyzed plants was approximately 10,000 molecules (Figure 3), which was consistent with the estimated data from fluorospectrometric analysis. Moreover, since the six transgenic lines can be taken as six replicates for the calculation of *ELIP* N<sub>0</sub>, the coefficient of variation was used to evaluate the reproducibility of the data; the variance was <5% when C<sub>b</sub> was within I<sub>b</sub> - 4 to I<sub>b</sub>. For simplicity, C<sub>b</sub> = I<sub>b</sub> was used in the present study.

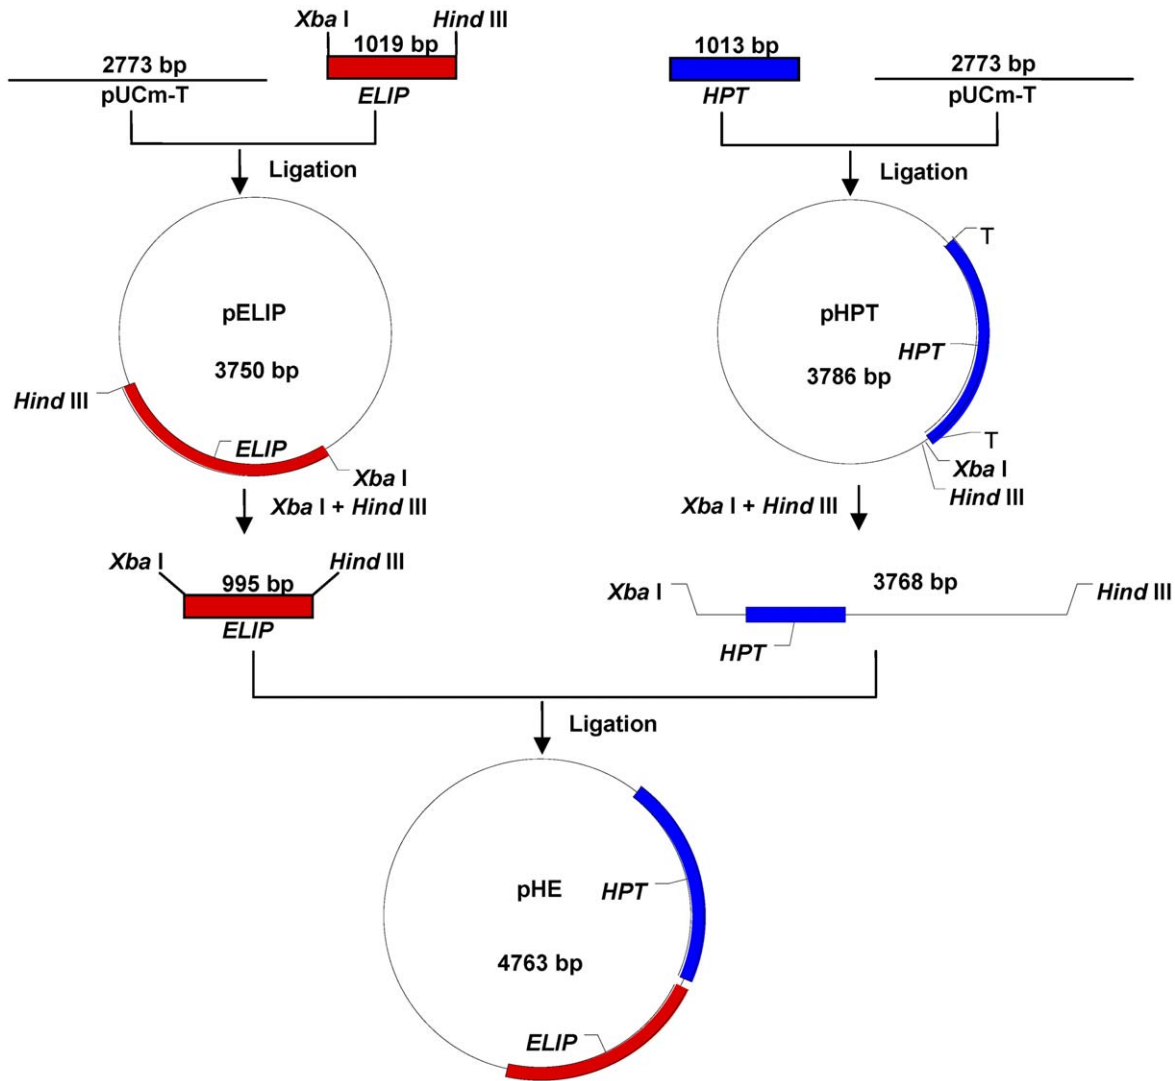

**Figure 2. Construction of recombinant plasmid pHE.** pELIP: plasmid harboring tomato *ELIP* gene; pHPT: plasmid harboring *Escherichia coli* *HPT* gene; pHE: plasmid harboring both tomato *ELIP* and *E. coli* *HPT* gene. doi:10.1371/journal.pone.0053489.g002

The Amount of Added pHE, S, Needs Not to Be Highly Accurate

$N_0$  of the internal reference gene was estimated through fluorospectrometric quantification. This is highly recommended as the quantification obtained from another commonly used

technique, UV spectrometric analysis, is not accurate due to severe interference from impurities commonly present in plant DNA samples. Sometimes, even with a fluorescence-based spectrometric technique, the quantification result may also not be highly accurate because of interference from impurities. This can also be the case for the standard DNA added.

**Table 2.** Effects of pHE DNA addition on PCR efficiency.

| Sample <sup>a</sup> | Volume of tomato genomic DNA ( $\mu$ l) <sup>b</sup> | Volume of pHE ( $\mu$ l) <sup>c</sup> | <i>ELIP</i>       |          |          | <i>HPT</i>        |          |          |
|---------------------|------------------------------------------------------|---------------------------------------|-------------------|----------|----------|-------------------|----------|----------|
|                     |                                                      |                                       | Average           | 5% level | 1% level | Average           | 5% level | 1% level |
| A                   | 1                                                    | 0                                     | 1.887 $\pm$ 0.036 | a        | A        | 1.876 $\pm$ 0.041 | a        | A        |
| B                   | 1                                                    | 1                                     | 1.875 $\pm$ 0.026 | a        | A        | 1.839 $\pm$ 0.018 | a        | A        |
| C                   | 1                                                    | 3                                     | 1.865 $\pm$ 0.027 | a        | A        | 1.880 $\pm$ 0.024 | a        | A        |

<sup>a</sup>A two-copy transgenic  $T_0$  tomato plant was used;

<sup>b</sup>The concentration was 10.20 ng  $\mu$ l<sup>-1</sup>, containing 10,000 *ELIP* and 10,000 *HPT* molecules  $\mu$ l<sup>-1</sup>;

<sup>c</sup>The concentration was 0.051  $\mu$ g  $\mu$ l<sup>-1</sup>, containing 10,000 *ELIP* and 10,000 *HPT* molecules  $\mu$ l<sup>-1</sup>.

doi:10.1371/journal.pone.0053489.t002

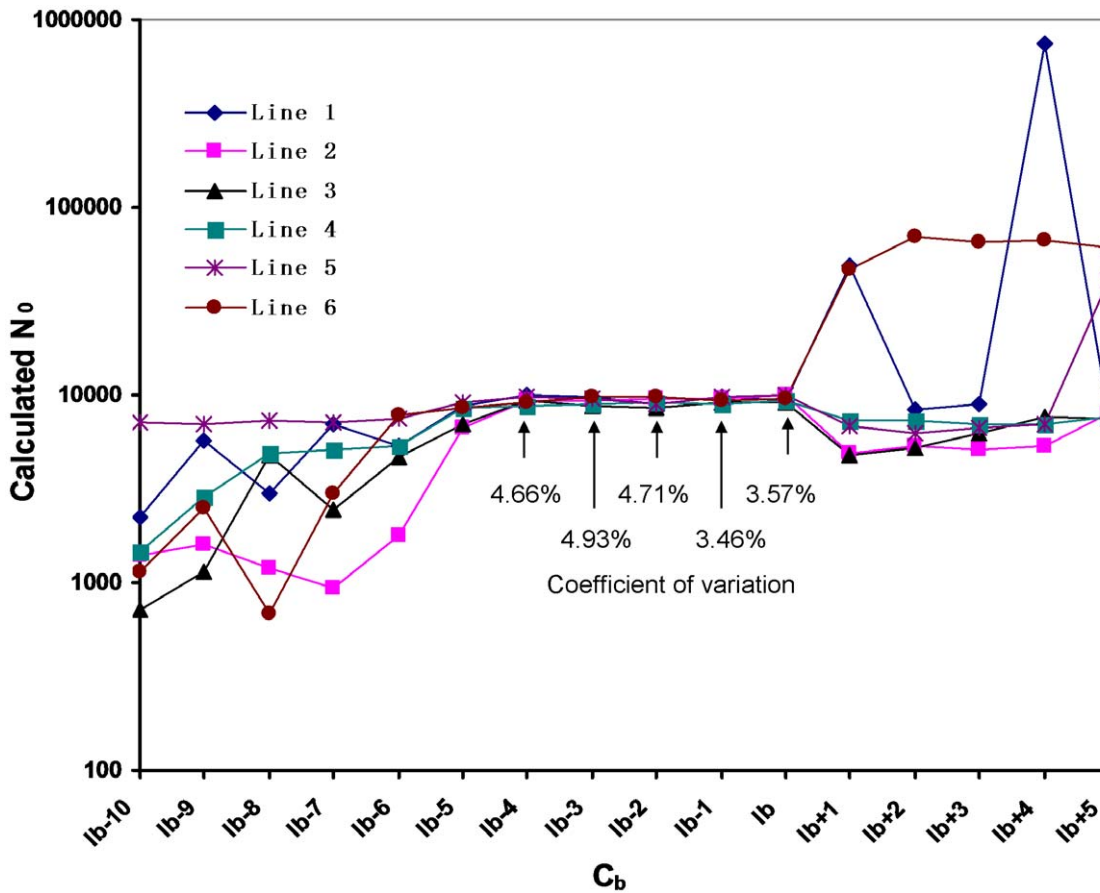

**Figure 3. Calculation of N<sub>0ELIP</sub> when taking a C<sub>b</sub> within I<sub>b</sub> -10 to I<sub>b</sub> +5.** The values above/beneath the arrows indicate the coefficient of variation. Line 1-Line 6 (L1-L6) were the six transgenic T<sub>0</sub> tomato lines; I<sub>b</sub> was set as the integer part for C<sub>tb</sub>; C<sub>b</sub> indicated cycles in the exponential amplification phase of sample B.  
doi:10.1371/journal.pone.0053489.g003

However, with a recombinant plasmid harboring both *r* and *t* served as the standard DNA, the amount added to the test samples does not need to be highly accurate. As clearly shown in Equation (20), the transgene copy number result was independent of S, the amount of added standard DNA.

### Transgene Copy Number Determination of Six Transgenic Tomato Plants

The *HPT* gene copy numbers in transgenic tomato plants were determined by the ratio of N<sub>0HPT</sub> to N<sub>0ELIP</sub>. The transgene copy number should be twice the ratio because of the diploid nature of tomato. In the present study, samples from six individual T<sub>0</sub> plants were analyzed: the data indicated that three lines had one copy of the transgene, while the other three lines had two copies (Table 3).

The transgene copy number of these six transgenic tomato plants was also analyzed by Southern blot (Figure 4), which confirmed the SAQPCR results obtained in the present study.

**Table 3. Determination of transgene copy number of six transgenic tomato plants by standard addition qPCR (SAQPCR).**

| Line | N <sub>0HPT</sub> | N <sub>0ELIP</sub> | N <sub>0HPT</sub> /N <sub>0ELIP</sub> | Transgene copy number <sup>a</sup> |
|------|-------------------|--------------------|---------------------------------------|------------------------------------|
| 1    | 4476.61           | 9273.31            | 0.48                                  | 1                                  |
| 2    | 4719.62           | 9912.54            | 0.48                                  | 1                                  |
| 3    | 4699.55           | 9084.33            | 0.51                                  | 1                                  |
| 4    | 9386.66           | 9361.90            | 1.00                                  | 2                                  |
| 5    | 9672.54           | 9901.20            | 0.97                                  | 2                                  |
| 6    | 9635.41           | 9565.91            | 1.01                                  | 2                                  |

A quantified amount of 10.20 ng of tomato genomic DNA, which contains around 10,000 molecules of *ELIP*, was included in each PCR reaction.  
<sup>a</sup>Refers to the copy number per diploid genome.  
doi:10.1371/journal.pone.0053489.t003

### Prospects for the Application of SAQPCR Approach to other Plants and Organisms

The transgene copy number of six transgenic tomato plants obtained by the SAQPCR approach was confirmed by Southern blot analysis (compare results in Table 3 and Figure 4). However, unlike the latter, only a small amount of plant tissue is required for SAQPCR, and the analysis can be completed in a much shorter time. Therefore, the approach is especially suitable for high throughput transgene copy number determination in small-sized plant species or cultivars, as well as slow-growing woody plants.

Although the approach was established on tomato with single-copy *ELIP* as the *r* and *HPT* as *t*, it is generally suitable for other plants and genes. Using transgenic kumquat (*Fortunella crassifolia* Swingle) [4], a type of citrus, with the single-copy mitochondrial



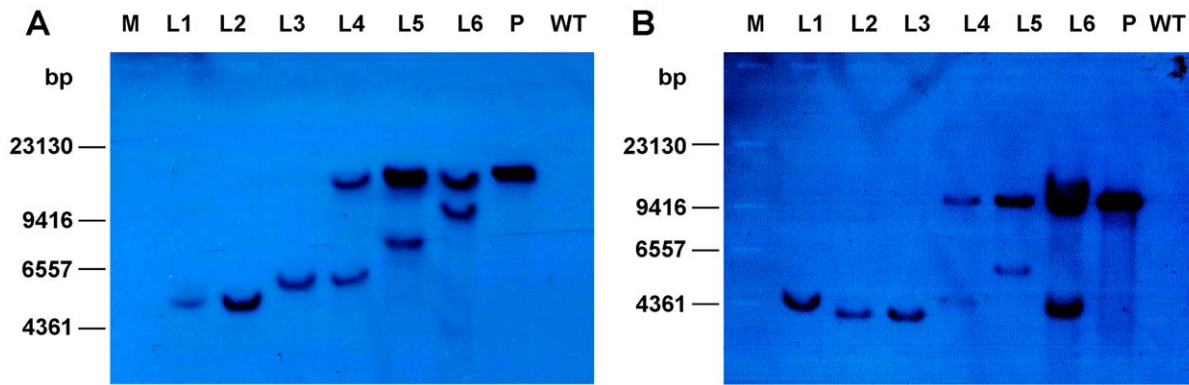

**Figure 4. Southern blot analysis of six transgenic tomato T<sub>0</sub> lines.** A) *Hind* III digestion; B) *Bam*H I digestion. M, λDNA/*Hind* III marker; L1-L6, transgenic tomato T<sub>0</sub> lines, were the same as those appeared in Figure 3 and Table 3; P, positive control (plasmid); WT, negative control (wild type). doi:10.1371/journal.pone.0053489.g004

citrate synthase gene (GenBank U19481) [30] serving as the *r* and the *Escherichia coli* neomycin phosphotransferase gene (*NPT II*) (GenBank V00618) as the *t*, we applied the protocol to quantify the transgene copy number of transgenic plants B2, C6 and C9, with results suggesting the former two lines are single copy per diploid genome and the third having three copies, which is consistent with the conclusions obtained from Southern blot analysis previously [4]. This approach should be also suitable for transgene copy number determination in other organisms although this has not been tested in this study. Furthermore, this approach can also readily be adapted for zygosity analysis of filial transgenic organisms.

**Summarized General SAQPCR and Data Analysis Protocol for Transgene Copy Number Determination**

Based on the procedures established in the present study, a general SAQPCR and data analysis protocol is summarized as following.

- 1) Select a single-copy internal reference gene (*r*) and an integrated target gene (*t*).
- 2) Construct the recombinant plasmid (pRT) harboring both *r* and *t*. After fluorescence quantification, dilute pRT to S (10,000 was recommended) molecules per microliter.
- 3) Extract genomic DNA of previously identified transgenic plants, and after fluorescence quantification, dilute to the concentration containing S molecules of *r* per microliter.
- 4) Set up template DNA series for qPCR analysis. Samples A, B, and C all contain 1μl of diluted plant genomic DNA, while they contain 0, 1μl and 3μl of diluted pRT DNA, respectively.
- 5) Perform qPCR with five replicates.
- 6) Obtain amplification data (fluorescence vs. cycle) as well as C<sub>t</sub>.
- 7) Set I<sub>b</sub> as the integer part for C<sub>tb</sub>, and C<sub>a</sub> = I<sub>b</sub>+1, C<sub>b</sub> = I<sub>b</sub> as well as C<sub>c</sub> = I<sub>b</sub>-1. Obtain the corresponding fluorescence intensity data, F<sub>a</sub>, F<sub>b</sub>, F<sub>c</sub>.
- 8) Calculate R<sub>r</sub> and then N<sub>0r</sub>, according to following equations.

$$R_r = (F_{ar} \times F_{cr}) / F_{br}^2$$

$$N_{0r} = S_r \times \left[ \sqrt{\frac{(3-2R_r)^2}{4 \times (1-R_r)^2} + \frac{R_r}{1-R_r}} - \frac{3-2R_r}{2 \times (1-R_r)} \right]$$

Note: a Microsoft Excel program (Program S1) was designed to facilitate calculation of N<sub>0</sub>.

- 9) Similarly, calculate R<sub>t</sub> and then N<sub>0t</sub> according to following equations.

$$R_t = (F_{at} \times F_{ct}) / F_{bt}^2$$

$$N_{0t} = S_t \times \left[ \sqrt{\frac{(3-2R_t)^2}{4 \times (1-R_t)^2} + \frac{R_t}{1-R_t}} - \frac{3-2R_t}{2 \times (1-R_t)} \right]$$

- 10) Calculate transgene copy number according to following equation.

$$\text{Transgene copy number} = \text{chromosome ploidy} \times N_{0t} / N_{0r}$$

**Conclusions**

A novel approach, SAQPCR, was established in the present study to accurately determine the transgene copy number without the necessity of obtaining PCR efficiency data. The strategy is to add a known amount of standard DNA, a recombinant plasmid harboring both *r* and *t*, to the test samples to change fluorescence intensity and C<sub>t</sub> values. On the basis of correlation between fluorescence value and the added DNA amount, a mathematical equation was reached to calculate the transgene copy number without the necessity of obtaining PCR efficiency data.

**Supporting Information**

**Program S1 A Microsoft Excel program for starting amount (N<sub>0</sub>) calculation by standard addition real-time PCR (SAQPCR).**  
(XLS)

## Author Contributions

Conceived and designed the experiments: YH CX KC. Performed the experiments: YH XY CZ WW CX. Analyzed the data: YH XY CZ WW

DG CX KC. Contributed reagents/materials/analysis tools: XY CZ CX KC. Wrote the paper: YH XY DG CX KC.

## References

- Hamilton AJ, Lycett GW, Grierson D (1990) Antisense gene that inhibits synthesis of the hormone ethylene in transgenic plants. *Nature* 346: 284–287.
- Hamilton AJ, Bouzayen M, Grierson D (1991) Identification of a tomato gene for the ethylene forming enzyme by expression in yeast. *Proc Natl Acad Sci U S A* 88: 7434–7437.
- Butelli E, Titta L, Giorgio M, Mock HP, Matros A, et al. (2008) Enrichment of tomato fruit with health-promoting anthocyanins by expression of select transcription factors. *Nat Biotechnol* 26: 1301–1308.
- Yang L, Xu CJ, Hu GB, Chen KS (2007) Establishment of an *Agrobacterium*-mediated transformation system for *Fortunella crassifolia*. *Biol Plant* 51: 541–545.
- Sha Y, Li S, Pei Z, Luo L, Tian Y, et al. (2004) Generation and flanking sequence analysis of a rice DNA tagged population. *Theor Appl Genet* 108: 306–314.
- Miyao A, Tanaka K, Murata K, Sawaki H, Takeda S, et al. (2003) Target site specificity of the *Tos17* retrotransposon shows a preference for insertion within genes and against insertion in retrotransposon-rich regions of the genome. *Plant Cell* 15: 1771–1780.
- Ingham DJ, Beer S, Money S, Hansen G (2001) Quantitative real-time PCR assay for determining transgene copy number in transformed plants. *Biotechniques* 31: 132–141.
- Mason G, Provero P, Vaira AM, Accotto GP (2002) Estimating the number of integrations in transformed plants by quantitative real-time PCR. *BMC Biotechnol* 2: 20.
- Song P, Cai CQ, Skokut M, Kosegi BD, Petolino JF (2002) Quantitative real-time PCR as a screening tool for estimating transgene copy number in WHISKERS™-derived transgenic maize. *Plant Cell Rep* 20: 948–954.
- Bubner B, Baldwin IT (2004) Use of real-time PCR for determining copy number and zygosity in transgenic plants. *Plant Cell Rep* 23: 263–271.
- Li ZW, Hansen JL, Liu Y, Zemetra RS, Berger PH (2004) Using real-time PCR to determine transgene copy number in wheat. *Plant Mol Biol Rep* 22: 179–188.
- Yang LT, Ding JY, Zhang CM, Jia JW, Weng HB, et al. (2005) Estimating the copy number of transgenes in transformed rice by real-time quantitative PCR. *Plant Cell Rep* 23: 759–763.
- Omar AA, Dekkers MGH, Graham JH, Grosser JW (2008) Estimation of transgene copy number in transformed citrus plants by quantitative multiplex real-time PCR. *Biotechnol Prog* 24: 1241–1248.
- Yi CX, Zhang J, Chan KM, Liu XK, Hong Y (2008) Quantitative real-time PCR assay to detect transgene copy number in cotton (*Gossypium hirsutum*). *Anal Biochem* 375: 150–152.
- Beltrán J, Jaimes H, Echeverry M, Ladino Y, López D, et al. (2009) Quantitative analysis of transgenes in cassava plants using real-time PCR technology. *In Vitro Cell Dev Biol-Plant* 45: 48–56.
- Casu RE, Selivanova A, Perroux JM (2012) High-throughput assessment of transgene copy number in sugarcane using real-time quantitative PCR. *Plant Cell Rep* 31: 167–177.
- Bubner B, Gase K, Baldwin IT (2004) Two-fold differences are the detection limit for determining transgene copy numbers in plants by real-time PCR. *BMC Biotechnol* 4: 14.
- Liu WH, Saint DA (2002) A new quantitative method of real time reverse transcription polymerase chain reaction assay based on simulation of polymerase chain reaction kinetics. *Anal Biochem* 302: 52–59.
- Bar T, Ståhlberg A, Muszta A, Kubista M (2003) Kinetic Outlier Detection (KOD) in real-time PCR. *Nucleic Acids Res* 31: e105.
- Tichopad A, Dilger M, Schwarz G, Pfaffl MW (2003) Standardized determination of real-time PCR efficiency from a single reaction set-up. *Nucleic Acids Res* 31: e122.
- Ruijter JM, Ramakers C, Hoogaars WMH, Karlen Y, Bakker O, et al. (2009) Amplification efficiency: linking baseline and bias in the analysis of quantitative PCR data. *Nucleic Acids Res* 37: e45.
- Karlen Y, McNair A, Perseguers S, Mazza C, Mermod N (2007) Statistical significance of quantitative PCR. *BMC Bioinformatics* 8: 131.
- D'haene B, Vandesompele J, Hellemans J (2010) Accurate and objective copy number profiling using real-time quantitative PCR. *Methods* 50: 262–270.
- Bar T, Kubista M, Tichopad A (2012) Validation of kinetics similarity in qPCR. *Nucleic Acids Res* 40: 1395–1406.
- Wang WW, Zhu CJ, Liu XH, Chen HS, Xu CJ (2011) Techniques for rapid preparation of tomato leaf DNA and its application in real-time quantitative PCR-based transgene detection. *Hereditas (Beijing)* 33: 1017–1022.
- Harris DC (2006) *Quantitative Chemical Analysis*, 7th edn. New York: W.H. Freeman and Company Press. 1008 p.
- Chen KS, Li F, Xu CJ, Zhang SL, Fu CX (2004) An efficient macro-method of genomic DNA isolation from *Actinidia chinensis* leaves. *Hereditas (Beijing)* 26: 529–531.
- Bruno AK, Wetzel CM (2004) The early light-inducible protein (ELIP) gene is expressed during the chloroplast-to-chromoplast transition in ripening tomato fruit. *J Exp Bot* 55: 2541–2548.
- Sambrook J, Russell DW (2001) *Molecular cloning: a laboratory manual*, 3rd edn. New York: Cold Spring Harbor Laboratory Press. 2344 p.
- Canel C, Bailey-Serres JN, Roose ML (1996) Molecular characterization of the mitochondrial citrate synthase gene of an acidless pummelo (*Citrus maxima*). *Plant Mol Biol* 31: 143–147.
